# Supplementary material
Source: PubMed Central journal article supplement (PMC2668067)
Supplement: mmc1.pdf [file mmc1.pdf]

## Supplemental Data

### Mitochondrial DNA Haplogroups M7b1'2 and M8a Affect Clinical Expression of Leber Hereditary Optic Neuropathy in Chinese Families with the m.11778G→A Mutation

Yanli Ji, A-Mei Zhang, Xiaoyun Jia, Ya-Ping Zhang, Xueshan Xiao, Shiqiang Li, Xiangming Guo, Hans-Jürgen Bandelt, Qingjiong Zhang, and Yong-Gang Yao

**Table S1. mtDNA Sequence Variation and Haplogroup Classification of 175 Families with m.11778G→A and LHON**

| Sample | Haplogroup | Region 16024-16569<br>(16000+) | Region 1-850<br>(all with 73 and 315+C)    | Coding Region Mutation <sup>a</sup>  |
|--------|------------|--------------------------------|--------------------------------------------|--------------------------------------|
| Le1053 | A          | 223 290 293C 319 519           | 152 263 309+C 523-524d 663 750             |                                      |
| Le1096 | A4         | 223 290 319 362                | 152 200 235 263 309+C 523-524d 663 750     | +663HaeIII; +5176AluI;<br>-9820HinfI |
| Le1351 | A4         | 209 223 274 290 319 362        | 152 207 235 309+C 523-524d 663 750         |                                      |
| Le216  | A4         | 223 290 319 362                | 152 207 235 309+C 329 523-524d 663 750     | +663HaeIII                           |
| Le243  | A4         | 223 290 319 362 519            | 195 200 235 263 309+C 523-524d 663 750     |                                      |
| Le296  | A4         | 124 223 290 319 362            | 152 235 263 309+C 523-524d 663 750         | +663HaeIII                           |
| Le615  | A4         | 223 290 319 325 362            | 41 152 235 263 523-524d 663 750            | +663HaeIII                           |
| Le67   | A4         | 223 290 319 362                | 152 200 235 263 309+C 523-524d 663 750     | +663HaeIII                           |
| Le917  | A4         | 124 223 290 319 362            | 151 152 200 235 263 309+C 523-524d 663 750 | +663HaeIII                           |
| Le977  | A4         | 129 223 290 319 362            | 152 179 235 263 663 750                    |                                      |
| Le458  | B4         | 182C 183C 189 217 261          | 263 309+CC 523-524d 750                    | 9bpd                                 |

|        |         |                                                   |                                                 |                                            |
|--------|---------|---------------------------------------------------|-------------------------------------------------|--------------------------------------------|
| Le856  | B4      | 182C 183C 189 217 223 519                         | 263 309+C 573+6C 709 750 827                    |                                            |
| Le1007 | B4a     | 129 182C 183C 189 217 261 311                     | 263 309+CC 523-524d 750                         | +5176AluI; 9bpd                            |
| Le546  | B4a     | 150 182C 183C 189 217 240 261                     | 143 263 309d 523-524d 750                       |                                            |
| Le942  | B4a     | 182C 183C 189 217 261 519                         | 263 309+C 523-524d 573+5C 750                   | 9bpd                                       |
| Le991  | B4a     | 129 182C 183C 189 217 261 519                     | 263 309+C 523-524d 750                          |                                            |
| Le1064 | B4a'g   | 129 182C 183C 189 217 261 356                     | 93 263 309+CC 513 523-524d 750                  |                                            |
| Le1321 | B4a'g   | 168 182C 183C 189 217 261 311 519                 | 182 185 263 309+C 523-524d 750                  |                                            |
| Le1003 | B4b1    | 136 183C 187A 189 217 519                         | 263 309+C 499 750 827                           |                                            |
| Le353  | B4b1    | 136 154 183C 189 217 218 519                      | 150 249d 263 309+CC 499 709 750 827             |                                            |
| Le269  | B4b1a   | 136 183C 189 217 519                              | 152 207 263 499 750 827                         |                                            |
| Le780  | B4b1a   | 93 136 183C 189 217 519                           | 207 263 499 750 827                             |                                            |
| Le931  | B4b1a   | 136 183C 189 217 519                              | 207 263 309+CC 499 523-524d 750 827             | 9bpd                                       |
| Le804  | B4b1b'c | 86 136 183C 189 217 218 519                       | 263 309+C 499 750 827                           |                                            |
| Le406  | B4b'd   | 183C 189 217 519                                  | 263 309+CC 316 750 827                          |                                            |
| Le1188 | B4c1    | 168 182C 183C 189 217 311 519                     | 263 309+CC 523-524d 750 794                     | -663HaeIII; +5176AluI;<br>-9820HinfI; 9bpd |
| Le782  | B4c1b   | 129 140 166 179 182C 183C 189 217 274 335 465 519 | 150 195 263 309d 709 750                        | 9bpd                                       |
| Le1114 | B4g     | 181C 182C 183C 189 213 217 261 278 292 519        | 263 302C 309+CC 455+T 523-524d 750              | -663HaeIII; +5176AluI;<br>-9820HinfI; 9bpd |
| Le1344 | B4g     | 90 181C 182C 183C 189 213 217 261 292 519         | 61A 62 263 309+CC 523-524d 750                  |                                            |
| Le1121 | B5a     | 93 140 183C 189 260 266G 311 519                  | 210 263 294 309+C 709 750                       | -663HaeIII; +5176AluI;<br>-9820HinfI; 9bpd |
| Le1365 | B5a     | 140 183C 189 266A 519                             | 210 263 309+CC 523-524d 709 750                 |                                            |
| Le1366 | B5a     | 140 183C 189 218 266A 519                         | 210 263 523-524d 709 750                        |                                            |
| Le18   | B5a     | 93 140 183C 189 260 266G 519                      | 210 263 294 309+C 709 750                       | -663HaeIII; 9bpd                           |
| Le416  | B5a     | 93 140 182C 183C 189 266A 519                     | 210 263 309+CC 523-524d 709 750                 | 9bpd                                       |
| Le74   | B5a     | 140 183C 189 266A 362 519                         | 150 210 263 309+CC 455+T 523-524d 709 750       | +5176AluI; -9820HinfI; 9bpd                |
| Le555  | B5a2    | 140 187 189 256 266G 519                          | 93 210 263 523-524d 709 750                     |                                            |
| Le246  | B5b     | 140 145 182C 183C 189 243 257 362 519             | 103 146 204 263 709 750                         | -9820HinfI; 9bpd                           |
| Le487  | B5b     | 140 182C 183C 189 243 519                         | 103 195 198 204 207 263 309+CC 523-524d 709 750 |                                            |

|        |    |                             |                              |                                            |
|--------|----|-----------------------------|------------------------------|--------------------------------------------|
| Le204  | C  | 223 298 327 519             | 249d 263 489 750             |                                            |
| Le51   | C  | 183C 189 223 298 327 519    | 249d 263 309+CC 489 593 750  | +5176AluI                                  |
| Le534  | C  | 223 298 327 519             | 146 249d 263 309+C 489 750   |                                            |
| Le767  | C  | 213 223 298 327 519         | 249d 263 309+C 489 750       |                                            |
| Le867  | C  | 223 298 327 519             | 146 249d 263 489 750         |                                            |
| Le889  | C  | 129 150 189 223 298 327 519 | 195 249d 263 309+CC 489 750  |                                            |
| Le912  | C  | 93 184 223 298 327 519      | 152 249d 263 309+C 489 750   |                                            |
| Le1278 | D4 | 174 362                     | 263 309+C 489 750            |                                            |
| Le1120 | D4 | 223 271 362 519             | 263 298 489 593 750          | -663HaeIII; 3010; -5176AluI;<br>-9820HinfI |
| Le1168 | D4 | 192 223 362                 | 263 489 750 869              | -663HaeIII; 3010; -5176AluI;<br>-9820HinfI |
| Le1191 | D4 | 223 362                     | 263 309+C 489 750            | -5176AluI                                  |
| Le1211 | D4 | 192 223 362                 | 263 489 750 869              | -5176AluI                                  |
| Le1367 | D4 | 223 362                     | 263 309+C 489 750            | -5176AluI                                  |
| Le385  | D4 | 174 223 352 362             | 263 309+C 489 523-524d 750   | 3010; -5176AluI; 10400                     |
| Le394  | D4 | 192 223 362 519             | 263 309+C 489 593 709 750    | -5176AluI                                  |
| Le442  | D4 | 129 223 274h 311h 362       | 263 298h 309+CC 489 750      | -5176AluI                                  |
| Le519  | D4 | 174 223 343 362             | 263 489 750                  | -5176AluI                                  |
| Le565  | D4 | 86 188 223 362              | 263 489 750                  | -5176AluI                                  |
| Le604  | D4 | 223 249 250 309 362         | 263 309+C 489 750            | -5176AluI                                  |
| Le631  | D4 | 172 362 519                 | 194 263 489 523-524d 722 750 | -5176AluI                                  |
| Le638  | D4 | 174 362                     | 263 309+C 489 750            | -5176AluI                                  |
| Le698  | D4 | 223 362 519                 | 152 195 263 309+C 489 750    | -5176AluI                                  |
| Le954  | D4 | 42 214 223 362              | 263 309+C 489 709 750        | -663HaeIII; 3010; -5176AluI                |
| Le812  | D4 | 174 177 223 362             | 263 309+C 489 573+5C 750     | 3010; -5176AluI                            |
| Le854  | D4 | 92 223 270 362              | 263 309+C 489 750            | -5176AluI                                  |
| Le894  | D4 | 184 311 362 519             | 194 263 489 523-524d 750     | -5176AluI                                  |
| Le930  | D4 | 223 362                     | 263 489 750                  | -5176AluI                                  |

|                    |        |                                              |                                        |                                            |
|--------------------|--------|----------------------------------------------|----------------------------------------|--------------------------------------------|
| Le952              | D4     | 223 362                                      | 263 309+C 489 523-524d 750 789         | -5176AluI                                  |
| Le976              | D4     | 93 188 214 223 362                           | 146 263 309+C 489 750                  | -5176AluI                                  |
| Le343              | D4a    | 129 223 362 519                              | 152 263 309+CC 489 750                 | -5176AluI                                  |
| Le392              | D4a    | 129 223 256 299 362 519                      | 152 263 489 750                        | -5176AluI                                  |
| Le457              | D4a    | 129 223 263 362                              | 151 152 263 309+C 489 750              |                                            |
| Le655              | D4a    | 129 223 362 519                              | 152 199 263 309+CC 489 750             |                                            |
| Le811              | D4a3   | 93 129 223 249 362                           | 143 146 152 196 263 309+C 489 750      |                                            |
| Le998              | D4b1   | 185 189 193d 223 232A 319 362                | 263 309+CC 489 523-524d 750            |                                            |
| Le539              | D4b1b  | 93 223 287 319 362 380                       | 263 309+C 431 489 523-524d 750         | -5176AluI; 9bpd                            |
| Le78               | D4b1c  | 158 223 284 287 319                          | 152 204 207 263 309+C 489 523-524d 750 | -663HaeIII; -9820HinfI;<br>10398, 10400    |
| Le285              | D4b2b  | 223 362 519                                  | 150 194 263 489 523-524d 750           |                                            |
| Le422              | D4b2b  | 223 283T 362 519                             | 152 194 263 489 523-524d 573+3C 750    |                                            |
| Le1017             | D4e1a1 | 93 176 223 362                               | 94 194 263 309+C 489 750               | 3010; -5176AluI                            |
| Le1013             | D4g2a  | 93 223 274 362                               | 263 298 309+C 489 499 750              |                                            |
| Le1139             | D4h    | 174 177 223 362                              | 263 309+C 489 573+5C 750               | -663HaeIII; 3010; -5176AluI;<br>-9820HinfI |
| Le1140             | D4h    | 174 223 352 362                              | 263 309+C 489 523-524d 750             | -663HaeIII; 3010; -5176AluI;<br>-9820HinfI |
| Le1215             | D4k    | 192 223                                      | 195 263 309+C 489 750                  |                                            |
| Le423              | D4k    | 192 223                                      | 195 263 309+C 489 750                  |                                            |
| Le884              | D4k    | 131 192 222 223 316 362                      | 184 195 263 309+C 489 750              |                                            |
| Le877 <sup>b</sup> | D5     | 93 129 189 362 519                           | 63 152 263 309+C 489 750               |                                            |
| Le1012             | D5a    | 164 172 182C 183C 189 209 223 266 362        | 150 263 489 523-524d 750 752 870       |                                            |
| Le1057             | D5a2   | 164 182C 183C 189 223 266 362 519            | 150 263 489 523-524d 750 752           |                                            |
| Le1108             | D5a2a  | 92 164 167 172 182C 183C 189 223 266 362     | 150 235 263 309+C 489 523-524d 750 752 | -663HaeIII; -5176AluI;<br>-9820HinfI       |
| Le563              | D5a2a  | 92 167 172 182C 183C 189 223 266 274 293 362 | 150 263 489 523-524d 750 752           | -5176AluI                                  |
| Le1104             | D5b    | 91 167 189 223 362                           | 150 189 263 456 489 681 750            |                                            |
| Le1231             | D5b    | 189 223 362 519                              | 150 263 309+C 456 489 681 750          | -663HaeIII; -5176AluI;                     |

|               |       |                                 |  |                                                 |  |                                                               |
|---------------|-------|---------------------------------|--|-------------------------------------------------|--|---------------------------------------------------------------|
|               |       |                                 |  |                                                 |  | -9820HinfI; 10343, 10397, 10398, 10400                        |
| Le141         | D5b   | 129 148 183C 189 362 519        |  | 150 152 185 263 309+C 456 489 523-524d 681 750  |  |                                                               |
| Le465         | D5b   | 148 183C 189 223 362 519        |  | 150 152 185 188 263 309+CC 456 489 681 750      |  | -5176AluI                                                     |
| Le779         | D5b   | 183C 189 223 249 357 362 519    |  | 150 263 309+CC 456 489 681 750                  |  |                                                               |
| Le835         | D5b   | 148 183C 189 223 362 519        |  | 150 152 185 263 309+CC 456 489 523-524d 681 750 |  | -5176AluI                                                     |
| Le853         | D5b   | 148 179 183C 189 223 362 519    |  | 150 152 185h 195 263 309+C 456 489 681 750      |  | -5176AluI                                                     |
| Le873         | D5b   | 91 167 189 223 362              |  | 150 189 263 456 489 681 750                     |  |                                                               |
| Le90          | D5b   | 183C 189 223 362 519            |  | 150 263 456 489 511 681 750                     |  | -5176AluI; -9820HinfI                                         |
| Le1357        | D5b2b | 223 362 519                     |  | 41 194 263 489 523-524d 750                     |  |                                                               |
| <b>Le699</b>  | F1a1  | 129 148 162 172 244 304 335 519 |  | 249d 263 309+C 523-524d 750                     |  |                                                               |
| <b>Le1048</b> | F1b   | 182C 183C 189 232A 304 519      |  | 152 249d 263 309d 523-524d 750                  |  | -663HaeIII; +5176AluI; -9820HinfI; 10223, 10235, 10310, 10609 |
| <b>Le886</b>  | F2a3  | 93 203 291 304 519              |  | 246 249d 263 296 309+C 750                      |  |                                                               |
| Le554         | G     | 93 223 362 519                  |  | 263 489 593 709 750                             |  | +5176AluI                                                     |
| <b>Le953</b>  | G1c   | 223 362 519                     |  | 263 309+C 489 593 709 750                       |  |                                                               |
| Le1355        | G1a1  | 189 221 223 325 362 519         |  | 150 263 489 709 750                             |  |                                                               |
| <b>Le1269</b> | G2a   | 129 223 278 362                 |  | 173 263 489 709 750                             |  | -663HaeIII; +5176AluI; -9820HinfI; 10398, 10400               |
| <b>Le1244</b> | G2a1  | 223 227 278 362                 |  | 152 263 489 573+5C 709 750                      |  |                                                               |
| <b>Le553</b>  | G2a1  | 117 223 227 278 362             |  | 263 489 709 750                                 |  |                                                               |
| Le1336        | G2a2  | 51 86 150 223 278 362           |  | 263 489 709 750                                 |  |                                                               |
| <b>Le696</b>  | G2b   | 223 362 463                     |  | 263 309+C 489 709 750                           |  | +5176AluI                                                     |
| Le145         | G3    | 93 223 274 362                  |  | 263 309+C 489 709 750                           |  |                                                               |
| Le237         | G3    | 223 274 362                     |  | 143 152 263 489 709 750                         |  |                                                               |
| Le647         | G3    | 223 274 362 390 519             |  | 263 489 574 709 750                             |  | +5176AluI                                                     |
| Le1081        | G3a   | 223 274 362                     |  | 143 146 152 263 489 709 750                     |  |                                                               |
| Le1295        | M10   | 223 248 271 311 519             |  | 263 309+CC 489 573+5C 709 750                   |  |                                                               |
| Le245         | M10   | 129 223 311                     |  | 263 309+C 489 573+5C 709 750                    |  | -663HaeIII; -9820HinfI;                                       |

|               |        |                                |                                               |                                                                                  |
|---------------|--------|--------------------------------|-----------------------------------------------|----------------------------------------------------------------------------------|
| Le1136        | M10a1  | 129 193 223 311 357 497        | 146 152 263 309+C 489 523-524d 573+4C 709 750 | 10245, 10398, 10400, 10646<br>-663HaeIII; +5176AluI;<br>-9820HinfI; 10398, 10400 |
| Le255         | M10a1  | 129 193 223 311 357 497        | 146 263 489 523-524d 573+5C 709 750           |                                                                                  |
| Le515         | M10a1  | 193 223 311 357 497            | 146 263 489 523-524d 573+5C 709 750           |                                                                                  |
| Le580         | M10a1  | 129 193 223 311 357 497        | 146 152 263 309+C 489 523-524d 573+4C 709 750 |                                                                                  |
| Le549         | M10b   | 66 220 223 311 519             | 263 489 573+4C 593 709 750                    |                                                                                  |
| Le869         | M12    | 223 234 287 290 362            | 125 127 128 263 309+C 318 489 513 523         |                                                                                  |
| Le918         | M12    | 223 234 287 290 362            | 125 127 128 263 309+C 318 489 513 523         |                                                                                  |
| Le1074        | M7b1   | 93 129 192 213 223 297 309 519 | 150 199 263 309+C 489 709 750                 |                                                                                  |
| Le1142        | M7b1   | 129 192 223 297                | 150 199 263 309+C 489 750                     |                                                                                  |
| <b>Le1174</b> | M7b1   | 92 129 192 223 297 360         | 150 159 199 263 309+CC 489 750                | -663HaeIII; +5176AluI;<br>+9820HinfI                                             |
| <b>Le217</b>  | M7b1   | 129 192 223 297                | 150 199 263 309+C 489 750                     | +9820HinfI                                                                       |
| <b>Le265</b>  | M7b1   | 92 129 192 223 254 297         | 150 159 182 199 263 489 750                   | +9820HinfI                                                                       |
| Le359         | M7b1   | 129 192 223 297                | 150 199 263 489 750                           |                                                                                  |
| <b>Le611</b>  | M7b1   | 129 192 223 297                | 150 199 263 309+CC 489 750                    | +9820HinfI                                                                       |
| Le666         | M7b1   | 129 192 223 297                | 150 199 263 309+C 489 750                     |                                                                                  |
| Le777         | M7b1   | 129 192 223 297                | 150 199 263 309+C 489 750                     | +9820HinfI                                                                       |
| Le807         | M7b1   | 129 192 223 297                | 150 195 199 263 309+C 489 750                 | +9820HinfI                                                                       |
| <b>Le1127</b> | M7b1'2 | 129 223 297                    | 146 150 199 263 309+C 489 750                 | -663HaeIII; +5176AluI;<br>+9820HinfI                                             |
| <b>Le924</b>  | M7b1'2 | 129 223 269 297 527            | 150 199 263 309+C 489 750                     | -663HaeIII; +5176AluI;<br>+9820HinfI                                             |
| Le978         | M7b1'2 | 129 189 223 297                | 150 199 204 263 309+CC 456 489 750            | +5176AluI; +9820HinfI                                                            |
| <b>Le35</b>   | M7b2   | 129 183C 189 223 297 298 311   | 150 199 263 309+CC 489 750                    | +5176AluI; +9820HinfI;<br>10345, 10398, 10400                                    |
| Le485         | M7b2   | 129 189 223 297 298            | 150 199 263 489 750                           |                                                                                  |
| Le1349        | M7c    | 172 223 291 295 311 519        | 146 153 263 309+C 489 523-524d 750            |                                                                                  |
| Le497         | M7c1   | 183C 189 223 274 295 519       | 146 152 199 263 309+CC 489 523-524d 750       |                                                                                  |

|                    |        |                                  |                                        |                                        |
|--------------------|--------|----------------------------------|----------------------------------------|----------------------------------------|
| Le529              | M7c1   | 223 295 519 527                  | 146 152 199 263 309+C 489 523-524d 750 |                                        |
| Le731              | M7c1   | 172 223 295 519                  | 146 199 263 309+CC 489 523-524d 750    |                                        |
| Le980              | M7c1   | 223 293 295 519                  | 146 199 263 309+C 489 523-524d 750     |                                        |
| Le262              | M7c1'2 | 223 249 295 519                  | 146 152 199 263 309+C 489 523-524d 750 | +9820HinfI                             |
| Le97               | M7c1'2 | 172 223 295 519                  | 146 152 199 263 489 523-524d 750       | +9820HinfI                             |
| Le124              | M7c3   | 519                              | 146A 199 263 309+CC 489 523-524d 750   | +9820HinfI                             |
| Le1346             | M7c3   | 223 293T 295 362 519             | 72 146 199 263 309+C 489 523-524d 750  |                                        |
| Le238 <sup>b</sup> | M7c3   | 183C 189 274 295 519             | 146 152 199 263 309+C 489 523-524d 750 |                                        |
| Le47               | M7c3   | 519                              | 146A 183 199 204 263 489 523-524d 750  | +9820HinfI                             |
| Le586              | M7c3   | 519                              | 146A 199 204 263 489 523-524d 750      |                                        |
| Le1329             | M8a    | 134 184 189 223 298 319          | 195 263 309+CC 489 750                 |                                        |
| <b>Le266</b>       | M8a    | 134 184 189 223 298 319          | 195 263 309+CC 489 750                 |                                        |
| Le719              | M8a    | 42 223 298 319                   | 185 203 263 489 750                    | +5176AluI; -9820HinfI;<br>10398, 10400 |
| Le251              | M8a1   | 185 223 260 298 311 519          | 152 249d 263 309+CC 489 593 709 750    |                                        |
| <b>Le1031</b>      | M8a2   | 184 223 298 319                  | 263 309+C 489 750                      |                                        |
| Le288              | M8a2   | 93 134 184 223 298 319 519       | 263 309+C 489 750                      |                                        |
| Le381              | M8a2   | 134 184 223 298 319              | 263 309+C 489 750                      |                                        |
| Le548              | M8a2   | 184 223 271 298 319              | 152 195 263 489 750                    |                                        |
| Le84               | M8a2   | 134 184 189 223 298 319          | 195 263 309+CC 489 750                 | +5176AluI                              |
| <b>Le258</b>       | M8a2b  | 184 223 298 319                  | 152 263 309+C 489 750                  |                                        |
| Le393              | M9a    | 223 234 294 316                  | 153 263 309+C 489 750                  |                                        |
| Le1014             | N9a    | 51 223 257A 261                  | 150 185 263 309+C 750                  |                                        |
| Le54               | N9a    | 183C 189 223 257A 261            | 150 263 309+CC 750                     |                                        |
| Le874              | N9a    | 189 223 257A                     | 150 263 309+C 750                      |                                        |
| Le675              | R11    | 92 145 182C 183C 189 311 390 519 | 185 189 195 263 709 750 789            |                                        |
| Le771              | R11    | 182C 183C 189 290 311 390        | 151 152 185 189 234 263 309+C 709 750  | +5176AluI                              |
| Le537              | U2b    | 51 93 209 239 263 311 352 353    | 146 152 234 263 292 309+CC 750         |                                        |
| Le399              | U4a    | 92 134 172 356 519               | 152 195 263 309+C 499 750              |                                        |

|        |     |                             |                                 |                                                                               |
|--------|-----|-----------------------------|---------------------------------|-------------------------------------------------------------------------------|
| Le1200 | Y   | 86 126 176 231 399 519      | 146 152 263 750                 |                                                                               |
| Le1261 | Y1b | 172 231 357 519             | 146 263 309+C 750               | -663 <i>Hae</i> III; +5176 <i>Alu</i> I;<br>-9820 <i>Hinf</i> I; 10238, 10398 |
| Le1328 | Y1b | 126 231 249 266 319 399 519 | 146 263 309+CC 709 750          |                                                                               |
| Le1361 | Y1b | 126 231 266 519             | 146 263 309+C 750               |                                                                               |
| Le310  | Y1b | 126 231 384 519             | 146 207 263 309+C 750           |                                                                               |
| Le1159 | Y2  | 126 231 311                 | 151 263 309+C 482 523-524d 750  |                                                                               |
| Le584  | Z   | 185 209 223 260 298 437     | 143 152 249d 263 309+CC 489 750 |                                                                               |

Note – Sequence variation was scored relative to the revised Cambridge reference sequence (rCRS)<sup>1</sup>. Suffixes A, G, C, and T indicate transversions; suffixes “h”, “d”, and “+” indicate heteroplasmy, deletions, and insertions, respectively. Indels (insertion and deletion) are recorded at the last possible site. “+” and “-” denote the presence and absence of the restriction site, respectively. The deletion of the 9-bp (CCCCCTCTA) repeat in the COII/tRNA<sup>lys</sup> intergenic region is abbreviated as “9bpd”. When sequence information was not available, slots have been left blank. The samples that were analyzed for the entire mtDNA sequences are marked with grey shade, with the sample name in italic and bold font. Samples Le696, Le1269, and Le1244 were from our previous studies<sup>2,3</sup>. The mtDNA sequences reported in Ji et al.<sup>4</sup> were also included, with the exception of sample Le508, for we could not confirm the presence of m.11778G→A in this patient in this study.

<sup>a</sup> The coding region mutations and the 9-bp deletion were screened using the same method as described in Yao et al.<sup>5</sup>.

<sup>b</sup> Samples Le238 and Le877 contained missing information in regions 16200-16253 and 16194-16291, respectively.



**Table S2. Penetrance of LHON in 182 Families with m.11778G→A**

| Sample | Haplo-group | Location       | No. of subjects | No. of affected subjects |         | No. of unaffected subjects |         |
|--------|-------------|----------------|-----------------|--------------------------|---------|----------------------------|---------|
|        |             |                |                 | Males                    | Females | Males                      | Females |
| Le1053 | A           | Shanxi         | 9               | 4                        | 0       | 2                          | 3       |
| Le1096 | A4          | Hunan          | 8               | 2                        | 1       | 2                          | 3       |
| Le296  | A4          | Hubei          | 7               | 2                        | 1       | 3                          | 1       |
| Le67   | A4          | Hunan          | 11              | 2                        | 1       | 3                          | 5       |
| Le917  | A4          | Hubei          | 19              | 4                        | 2       | 3                          | 10      |
| Le977  | A4          | Hebei          | 6               | 3                        | 1       | 1                          | 1       |
| Le216  | A4          | Fujian         | 4               | 2                        | 0       | 1                          | 1       |
| Le615  | A4          | Hunan          | 6               | 3                        | 0       | 1                          | 2       |
| Le1351 | A4          | Jiangxi        | 2               | 1                        | 0       | 0                          | 1       |
| Le243  | A4          | Tianjin        | 3               | 1                        | 1       | 0                          | 1       |
| Le458  | B4          | Fujian         | 13              | 3                        | 1       | 7                          | 2       |
| Le856  | B4          | Jiangsu        | 7               | 3                        | 0       | 1                          | 3       |
| Le546  | B4a         | Hebei          | 9               | 1                        | 1       | 2                          | 5       |
| Le942  | B4a         | Guangdong      | 14              | 2                        | 2       | 4                          | 6       |
| Le991  | B4a         | Hebei          | 15              | 1                        | 1       | 3                          | 10      |
| Le1007 | B4a         | Hubei          | 6               | 1                        | 1       | 3                          | 1       |
| Le1064 | B4a'g       | Guangdong      | 22              | 5                        | 0       | 11                         | 6       |
| Le1321 | B4a'g       | Hunan          | 10              | 3                        | 2       | 2                          | 3       |
| Le1003 | B4b1        | Unknown        | 7               | 2                        | 1       | 1                          | 3       |
| Le353  | B4b1        | Inner Mongolia | 4               | 3                        | 0       | 0                          | 1       |
| Le780  | B4b1a       | Shanxi         | 2               | 1                        | 1       | 0                          | 0       |
| Le269  | B4b1a       | Shandong       | 16              | 2                        | 0       | 4                          | 10      |
| Le931  | B4b1a       | Jiangxi        | 8               | 2                        | 0       | 3                          | 3       |
| Le804  | B4b1b'c     | Hebei          | 11              | 2                        | 1       | 2                          | 6       |
| Le406  | B4b'd       | Hebei          | 9               | 2                        | 2       | 1                          | 4       |
| Le1188 | B4c1        | Guangdong      | 19              | 4                        | 3       | 4                          | 8       |
| Le782  | B4c1b       | Guangdong      | 13              | 3                        | 3       | 3                          | 4       |
| Le1114 | B4g         | Guangdong      | 4               | 2                        | 0       | 2                          | 0       |
| Le1344 | B4g         | Guangxi        | 8               | 2                        | 1       | 4                          | 1       |
| WZ1    | B5a         | Fujian         | 38              | 6                        | 0       | 16                         | 16      |
| Le74   | B5a         | Hunan          | 9               | 2                        | 3       | 1                          | 3       |
| Le1121 | B5a         | Guangdong      | 8               | 1                        | 1       | 3                          | 3       |
| Le18   | B5a         | Guangdong      | 9               | 3                        | 1       | 2                          | 3       |
| Le416  | B5a         | Hunan          | 5               | 3                        | 0       | 0                          | 2       |
| Le1365 | B5a         | Sichuan        | 10              | 1                        | 1       | 2                          | 6       |
| Le1366 | B5a         | Zhejiang       | 6               | 0                        | 2       | 2                          | 2       |
| Le555  | B5a2        | Jiangsu        | 2               | 1                        | 1       | 0                          | 0       |
| Le487  | B5b         | Shanxi         | 25              | 3                        | 1       | 5                          | 16      |
| Le246  | B5b         | Guangdong      | 3               | 1                        | 0       | 1                          | 1       |
| Le51   | C           | Guangdong      | 8               | 3                        | 2       | 2                          | 1       |

|        |        |              |    |   |   |    |    |
|--------|--------|--------------|----|---|---|----|----|
| Le534  | C      | Henan        | 12 | 5 | 1 | 4  | 2  |
| Le767  | C      | Henan        | 7  | 2 | 0 | 1  | 4  |
| Le867  | C      | Heilongjiang | 3  | 2 | 0 | 0  | 1  |
| Le912  | C      | Cambodia     | 3  | 2 | 0 | 0  | 1  |
| Le204  | C      | Hebei        | 4  | 3 | 0 | 0  | 1  |
| Le889  | C      | Hebei        | 9  | 3 | 0 | 2  | 4  |
| Le1278 | D4     | Ningxia      | 11 | 2 | 1 | 3  | 5  |
| Le854  | D4     | Guangdong    | 10 | 0 | 2 | 5  | 3  |
| Le394  | D4     | Hebei        | 14 | 2 | 2 | 3  | 7  |
| Le519  | D4     | Guangxi      | 8  | 1 | 1 | 3  | 3  |
| Le565  | D4     | Hebei        | 24 | 1 | 1 | 8  | 14 |
| Le638  | D4     | Hebei        | 2  | 1 | 1 | 0  | 0  |
| Le954  | D4     | Hubei        | 2  | 1 | 1 | 0  | 0  |
| Le1168 | D4     | Guangdong    | 10 | 2 | 1 | 2  | 5  |
| Le894  | D4     | Hebei        | 7  | 2 | 1 | 2  | 2  |
| Le930  | D4     | Hebei        | 18 | 2 | 1 | 6  | 9  |
| Le976  | D4     | Hebei        | 33 | 4 | 2 | 10 | 17 |
| Le1120 | D4     | Jiangxi      | 5  | 2 | 0 | 1  | 2  |
| Le1191 | D4     | Hunan        | 1  | 1 | 0 | 0  | 0  |
| Le1211 | D4     | Guangdong    | 3  | 1 | 0 | 2  | 0  |
| Le385  | D4     | Hunan        | 7  | 1 | 0 | 3  | 3  |
| Le442  | D4     | Hebei        | 3  | 1 | 1 | 0  | 1  |
| Le604  | D4     | Hebei        | 20 | 4 | 0 | 5  | 11 |
| Le698  | D4     | Hebei        | 1  | 1 | 0 | 0  | 0  |
| Le812  | D4     | Hunan        | 5  | 2 | 0 | 2  | 1  |
| Le952  | D4     | Beijing      | 10 | 2 | 0 | 4  | 4  |
| Le1357 | D4     | Shandong     | 11 | 2 | 1 | 6  | 2  |
| Le1367 | D4     | Hubei        | 13 | 3 | 2 | 5  | 3  |
| Le631  | D4     | Henan        | 13 | 2 | 2 | 6  | 3  |
| Le655  | D4a    | Hebei        | 5  | 0 | 2 | 2  | 1  |
| Le457  | D4a    | Hebei        | 6  | 2 | 1 | 2  | 1  |
| Le343  | D4a    | Jiangxi      | 12 | 3 | 0 | 3  | 6  |
| Le392  | D4a    | Unknown      | 4  | 2 | 0 | 1  | 1  |
| Le811  | D4a3   | Shandong     | 7  | 1 | 1 | 2  | 3  |
| Le998  | D4b1   | Shandong     | 11 | 2 | 0 | 3  | 6  |
| Le539  | D4b1b  | Hunan        | 13 | 3 | 0 | 4  | 6  |
| WZ3    | D4b1b2 | Jiangsu      | 9  | 4 | 2 | 0  | 3  |
| Le78   | D4b1c  | Guangdong    | 4  | 2 | 1 | 0  | 1  |
| WZ5    | D4b2b  | Unknown      | 13 | 4 | 1 | 4  | 4  |
| Le285  | D4b2b  | Shanxi       | 12 | 2 | 1 | 6  | 3  |
| Le422  | D4b2b  | Zhejiang     | 8  | 2 | 0 | 3  | 3  |
| Le1017 | D4e1a1 | Anhui        | 4  | 1 | 1 | 1  | 1  |
| Le1013 | D4g2a  | Hebei        | 8  | 1 | 2 | 3  | 2  |
| Le1140 | D4h    | Hunan        | 14 | 3 | 1 | 7  | 3  |

|        |       |           |    |    |    |    |    |
|--------|-------|-----------|----|----|----|----|----|
| Le1139 | D4h   | Hunan     | 9  | 3  | 0  | 3  | 3  |
| WZ12   | D4j   | Zhejiang  | 28 | 7  | 3  | 7  | 11 |
| Le884  | D4k   | Hebei     | 5  | 1  | 2  | 0  | 2  |
| Le1215 | D4k   | Hebei     | 13 | 4  | 3  | 0  | 6  |
| Le423  | D4k   | Hebei     | 16 | 4  | 2  | 2  | 8  |
| Le877  | D5    | Shandong  | 10 | 2  | 1  | 4  | 3  |
| WZ2    | D5a   | Anhui     | 13 | 6  | 2  | 1  | 4  |
| Le1012 | D5a2  | Hebei     | 20 | 3  | 10 | 4  | 3  |
| Le1057 | D5a2  | Hebei     | 4  | 2  | 0  | 0  | 2  |
| Le563  | D5a2a | Guangdong | 7  | 2  | 1  | 0  | 4  |
| Le1108 | D5a2a | Sichuan   | 21 | 4  | 0  | 5  | 12 |
| Le1231 | D5b   | Hubei     | 10 | 1  | 3  | 0  | 6  |
| Le873  | D5b   | Henan     | 4  | 2  | 1  | 0  | 1  |
| Le1104 | D5b   | Unknown   | 16 | 3  | 1  | 5  | 7  |
| Le141  | D5b   | Hebei     | 3  | 2  | 0  | 0  | 1  |
| Le465  | D5b   | Guangdong | 8  | 2  | 0  | 2  | 4  |
| Le835  | D5b   | Guangxi   | 13 | 1  | 0  | 5  | 7  |
| Le853  | D5b   | Hubei     | 6  | 2  | 1  | 2  | 1  |
| Le90   | D5b   | Guangdong | 10 | 2  | 0  | 1  | 7  |
| Le779  | D5b   | Unknown   | 16 | 3  | 3  | 5  | 5  |
| WZ4    | F1    | Zhejiang  | 8  | 3  | 0  | 2  | 3  |
| Le699  | F1a1  | Hebei     | 4  | 2  | 1  | 0  | 1  |
| Le1048 | F1b   | Hunan     | 7  | 2  | 0  | 0  | 5  |
| Le886  | F2a3  | Hebei     | 8  | 0  | 2  | 3  | 3  |
| Le554  | G     | Henan     | 9  | 0  | 2  | 0  | 7  |
| Le953  | G1    | Hebei     | 5  | 2  | 1  | 0  | 2  |
| Le1355 | G1a1  | Jiangxi   | 4  | 1  | 1  | 1  | 1  |
| Le1269 | G2a   | Henan     | 30 | 9  | 7  | 5  | 9  |
| Le553  | G2a1  | Hebei     | 7  | 2  | 1  | 3  | 1  |
| Le1244 | G2a1  | Jiangxi   | 13 | 3  | 0  | 4  | 6  |
| Le1336 | G2a2  | Hebei     | 10 | 7  | 0  | 0  | 3  |
| Le696  | G2b   | Hebei     | 14 | 8  | 3  | 2  | 1  |
| Le647  | G3    | Hebei     | 21 | 2  | 3  | 8  | 8  |
| Le145  | G3    | Unknown   | 5  | 2  | 1  | 0  | 2  |
| Le237  | G3    | Jilin     | 5  | 2  | 1  | 0  | 2  |
| Le1081 | G3a   | Hebei     | 16 | 3  | 1  | 3  | 9  |
| Le245  | M10   | Guangdong | 7  | 3  | 1  | 2  | 1  |
| Le1295 | M10   | Hebei     | 33 | 10 | 3  | 9  | 11 |
| WZ6    | M10a  | Unknown   | 30 | 6  | 4  | 12 | 8  |
| Le255  | M10a1 | Henan     | 13 | 2  | 1  | 3  | 7  |
| Le515  | M10a1 | Hebei     | 6  | 2  | 0  | 1  | 3  |
| Le580  | M10a1 | Jiangsu   | 7  | 2  | 0  | 1  | 4  |
| Le1136 | M10a1 | Hubei     | 7  | 2  | 0  | 2  | 3  |
| Le549  | M10b  | Anhui     | 10 | 3  | 1  | 3  | 3  |

|        |        |           |    |   |   |   |    |
|--------|--------|-----------|----|---|---|---|----|
| Le918  | M12    | Hubei     | 17 | 4 | 3 | 4 | 6  |
| Le869  | M12    | Hubei     | 18 | 4 | 2 | 5 | 7  |
| Le978  | M7b    | Guangdong | 6  | 5 | 0 | 0 | 1  |
| Le1142 | M7b1   | Guangxi   | 7  | 1 | 1 | 2 | 3  |
| Le265  | M7b1   | Hunan     | 9  | 3 | 3 | 0 | 3  |
| Le611  | M7b1   | Guangxi   | 3  | 1 | 1 | 0 | 1  |
| Le777  | M7b1   | Guangdong | 5  | 1 | 1 | 3 | 0  |
| Le217  | M7b1   | Guangdong | 11 | 5 | 4 | 0 | 2  |
| Le359  | M7b1   | Hebei     | 16 | 2 | 1 | 5 | 8  |
| Le1074 | M7b1   | Jilin     | 7  | 4 | 0 | 1 | 2  |
| Le1174 | M7b1   | Guangdong | 7  | 3 | 0 | 1 | 3  |
| Le666  | M7b1   | Guangdong | 6  | 2 | 0 | 1 | 3  |
| Le807  | M7b1   | Guangdong | 8  | 3 | 0 | 0 | 5  |
| Le1127 | M7b1'2 | Guangdong | 16 | 2 | 0 | 5 | 9  |
| Le924  | M7b1'2 | Guangdong | 9  | 3 | 0 | 4 | 2  |
| Le485  | M7b2   | Hebei     | 21 | 3 | 4 | 4 | 10 |
| Le35   | M7b2   | Guangdong | 5  | 3 | 0 | 1 | 1  |
| Le1349 | M7c    | Hunan     | 9  | 3 | 0 | 3 | 3  |
| Le529  | M7c1   | Anhui     | 12 | 1 | 3 | 3 | 5  |
| Le731  | M7c1   | Hebei     | 9  | 1 | 2 | 3 | 3  |
| Le497  | M7c1   | Hebei     | 17 | 2 | 1 | 7 | 7  |
| Le980  | M7c1   | Guangdong | 13 | 2 | 0 | 3 | 8  |
| Le97   | M7c1'2 | Guangdong | 9  | 3 | 1 | 3 | 2  |
| Le262  | M7c1'2 | Guangdong | 1  | 1 | 0 | 0 | 0  |
| Le124  | M7c3   | Guangxi   | 19 | 2 | 0 | 7 | 10 |
| Le47   | M7c3   | Guangdong | 9  | 3 | 0 | 3 | 3  |
| Le586  | M7c3   | Hebei     | 12 | 3 | 1 | 4 | 4  |
| Le1346 | M7c3   | Hunan     | 8  | 1 | 1 | 6 | 0  |
| Le238  | M7c3   | Beijing   | 4  | 3 | 0 | 0 | 1  |
| Le719  | M8a    | Unknown   | 8  | 2 | 0 | 2 | 4  |
| Le1329 | M8a    | Guangdong | 14 | 2 | 0 | 6 | 6  |
| Le266  | M8a    | Guangdong | 17 | 2 | 0 | 7 | 8  |
| Le251  | M8a1   | Henan     | 5  | 2 | 3 | 0 | 0  |
| Le381  | M8a2   | Hebei     | 14 | 0 | 2 | 5 | 7  |
| Le548  | M8a2   | Hebei     | 8  | 0 | 1 | 4 | 3  |
| Le288  | M8a2   | Henan     | 9  | 2 | 1 | 2 | 4  |
| Le1031 | M8a2   | Henan     | 18 | 2 | 0 | 4 | 12 |
| Le84   | M8a2   | Guangdong | 14 | 2 | 0 | 6 | 6  |
| Le258  | M8a2b  | Shandong  | 5  | 1 | 0 | 3 | 1  |
| Le393  | M9a    | Hebei     | 8  | 1 | 3 | 2 | 2  |
| Le1014 | N9a    | Hebei     | 10 | 3 | 0 | 3 | 4  |
| Le874  | N9a    | Henan     | 18 | 2 | 2 | 7 | 7  |
| Le54   | N9a    | Guangdong | 6  | 2 | 0 | 2 | 2  |
| Le675  | R11    | Hebei     | 7  | 4 | 0 | 1 | 2  |

|        |     |           |      |     |     |     |     |
|--------|-----|-----------|------|-----|-----|-----|-----|
| Le771  | R11 | Shanxi    | 2    | 2   | 0   | 0   | 0   |
| Le537  | U2b | Xinjiang  | 15   | 2   | 0   | 4   | 9   |
| Le399  | U4a | Unknown   | 14   | 1   | 0   | 4   | 9   |
| Le1200 | Y   | Guangdong | 13   | 2   | 0   | 6   | 5   |
| Le1261 | Y1b | Sichuan   | 10   | 2   | 0   | 1   | 7   |
| Le310  | Y1b | Tianjin   | 16   | 4   | 0   | 5   | 7   |
| Le1328 | Y1b | Beijing   | 2    | 2   | 0   | 0   | 0   |
| Le1361 | Y1b | Guangdong | 11   | 2   | 1   | 5   | 3   |
| Le1159 | Y2  | Shandong  | 8    | 2   | 0   | 3   | 3   |
| Le584  | Z   | Henan     | 9    | 1   | 1   | 3   | 4   |
| Total  |     |           | 1859 | 436 | 183 | 504 | 736 |

Note – Samples WZ1-WZ6 and WZ12 were taken from the published resources<sup>6-10</sup>. Samples Le696, Le1269, and Le1244 were from our previous studies<sup>2,3</sup>.

## Supplemental References

1. Andrews, R.M., Kubacka, I., Chinnery, P.F., Lightowlers, R.N., Turnbull, D.M., and Howell, N. (1999). Reanalysis and revision of the Cambridge reference sequence for human mitochondrial DNA. *Nat. Genet.* 23, 147.
2. Wang, H.-W., Jia, X., Ji, Y., Kong, Q.-P., Zhang, Q., Yao, Y.-G., and Zhang, Y.-P. (2008). Strikingly different penetrance of LHON in two Chinese families with primary mutation G11778A is independent of mtDNA haplogroup background and secondary mutation G13708A. *Mutat. Res.* 643, 48-53.
3. Zhang, A.-M., Jia, X., Yao, Y.-G., and Zhang, Q. (2008). Co-occurrence of A1555G and G11778A in a Chinese family with high penetrance of Leber's hereditary optic neuropathy. *Biochem. Biophys. Res. Commun.* 376, 221-224.
4. Ji, Y., Jia, X., Zhang, Q., and Yao, Y.-G. (2007). mtDNA haplogroup distribution in Chinese patients with Leber's hereditary optic neuropathy and G11778A mutation. *Biochem. Biophys. Res. Commun.* 364, 238-242.
5. Yao, Y.-G., Kong, Q.-P., Bandelt, H.-J., Kivisild, T., and Zhang, Y.-P. (2002). Phylogeographic differentiation of mitochondrial DNA in Han Chinese. *Am. J. Hum. Genet.* 70, 635-651.
6. Li, R., Qu, J., Zhou, X., Tong, Y., Hu, Y., Qian, Y., Lu, F., Mo, J.-Q., West, C.-E., and Guan, M.-X. (2006). The mitochondrial tRNA(Thr) A15951G mutation may influence the phenotypic expression of the LHON-associated ND4 G11778A mutation in a Chinese family. *Gene* 376, 79-86.
7. Qian, Y., Zhou, X., Hu, Y., Tong, Y., Li, R., Lu, F., Yang, H., Mo, J.-Q., Qu, J., and Guan, M.-X. (2005). Clinical evaluation and mitochondrial DNA sequence analysis in three Chinese families with Leber's hereditary optic neuropathy. *Biochem. Biophys. Res. Commun.* 332, 614-621.
8. Qu, J., Li, R., Tong, Y., Hu, Y., Zhou, X., Qian, Y., Lu, F., and Guan, M.-X. (2005). Only male matrilineal relatives with Leber's hereditary optic neuropathy in a large Chinese family carrying the mitochondrial DNA G11778A mutation. *Biochem. Biophys. Res. Commun.* 328, 1139-1145.
9. Qu, J., Li, R., Zhou, X., Tong, Y., Lu, F., Qian, Y., Hu, Y., Mo, J.-Q., West, C.-E., and Guan, M.-X. (2006). The novel A4435G mutation in the mitochondrial tRNAMet may modulate the phenotypic expression of the LHON-associated ND4 G11778A mutation. *Invest. Ophthalmol. Vis. Sci.* 47, 475-483.
10. Qu, J., Li, R., Zhou, X., Tong, Y., Yang, L., Chen, J., Zhao, F., Lu, C., Qian, Y., Lu, F., and Guan, M.-X. (2007). Cosegregation of the ND4 G11696A mutation with the LHON-associated ND4 G11778A mutation in a four generation Chinese family. *Mitochondrion* 7, 140-146.
